# Supplementary material
Source: publisher figshare collection journal article supplement (https://asha.figshare.com/articles/dataset/_/25718412)
Supplement: Supplementary file 1 [file 1]

## Supplemental Material S1. Intercode reliability for critical data items.

| Item Extracted                                     | Proportion of Absolute Agreement, Where Reported |
|----------------------------------------------------|--------------------------------------------------|
| Total <i>n</i> participants                        | .90                                              |
| <i>n</i> Women/girls                               | .88                                              |
| <i>n</i> Men/boys                                  | .86                                              |
| <i>n</i> Gender-Diverse                            | .99                                              |
| <i>n</i> Gender Not Reported                       | .91                                              |
| <i>n</i> Asian                                     | .95                                              |
| <i>n</i> Black or African American                 | .90                                              |
| <i>n</i> American Indian or Alaska Native          | .95                                              |
| <i>n</i> White                                     | .86                                              |
| <i>n</i> Native Hawaiian or Other Pacific Islander | .96                                              |
| <i>n</i> Multi-Racial                              | .92                                              |
| <i>n</i> Other Race                                | .77                                              |
| <i>n</i> Race Reported as Unknown                  | .92                                              |
| <i>n</i> Hispanic or Latino(a)(x)                  | .74                                              |
| <i>n</i> Not Hispanic or Latino(a)(x)              | .76                                              |
| <i>n</i> Ethnicity Reported as Unknown             | .96                                              |
| Sex/gender included in analyses?                   | .92                                              |
| Sex/gender included in discussion?                 | .93                                              |
| Race/ethnicity included in analyses?               | .97                                              |
| Race/ethnicity included in discussion?             | .93                                              |
| Sex defined as distinct from gender?               | .99                                              |
| Race defined as distinct from ethnicity?           | .91                                              |

*Note.* Values reflect disagreements prior to discrepancy resolutions. Gender categories include data given as sex (e.g., male, female) unless explicitly differentiated from gender. Race and ethnicity categories were operationalized per guidelines from the National Institutes of Health (NIH; 2015a).
