# Supplementary material
Source: publisher figshare collection journal article supplement (https://asha.figshare.com/articles/dataset/_/25718412)
Supplement: Supplementary file 2 [file 1]

**Supplemental Material S2.** Articles included in final corpus for systematic review.

| Author(s)                                                                                                       | Title                                                                                                                                           | Journal      |
|-----------------------------------------------------------------------------------------------------------------|-------------------------------------------------------------------------------------------------------------------------------------------------|--------------|
| Abou-Dahech, T., & Gabel, R.                                                                                    | Vocational stereotyping of people who stutter: Human resource management students                                                               | Perspectives |
| Abur, D., & Stepp, C. E.                                                                                        | Acuity to changes in self-generated vocal pitch in Parkinson's disease                                                                          | JSLHR        |
| Akbari, C., & Aoyama, K.                                                                                        | Epenthetic vowels and phonemic vowels: Same or different?                                                                                       | Perspectives |
| Al-Salim, S., Moeller, M. P., & McGregor, K. K.                                                                 | Performance of children with hearing loss on an audiovisual version of a nonword repetition task                                                | LSHSS        |
| Allen, S., & Mayo, R.                                                                                           | Speech-language pathologists' perceptions of school-based services for children with hearing loss                                               | LSHSS        |
| Alonzo, C. N., McIlraith, A. L., Catts, H. W., & Hogan, T. P.                                                   | Predicting dyslexia in children with developmental language disorder                                                                            | JSLHR        |
| Alt, M., Mettler, H. M., Erikson, J. A., Figueroa, C. R., Etters-Thomas, S. E., Arizmendi, G. D., & Oglivie, T. | Exploring input parameters in an expressive vocabulary treatment with late talkers                                                              | JSLHR        |
| Anderson, J. D., Wagovich, S. A., & Ofoe, L.                                                                    | Cognitive flexibility for semantic and perceptual information in developmental stuttering                                                       | JSLHR        |
| Andres, E. M., Earnest, K. K., Smith, S. D., Rice, M. L., & Hashim Raza, M.                                     | Pedigree-based gene mapping supports previous loci and reveals novel suggestive loci in specific language impairment                            | JSLHR        |
| Apel, K., & Henbest, V. S.                                                                                      | Morphological awareness skills of second- and third-grade students with and without speech sound disorders                                      | LSHSS        |
| Ash, A. C., Christopoulos, T. T., & Redmond, S. M.                                                              | "Tell me about your child": A grounded theory study of mothers' understanding of language disorder                                              | AJSLP        |
| Aviv-Reich, M., Roberts, M. Y., & Grieco-Calub, T. M.                                                           | Quantifying the effects of background speech babble on preschool children's novel word learning in a multisession paradigm: A preliminary study | JSLHR        |
| Bahr, R. H., Silliman, E. R., & Berninger, V. W.                                                                | Derivational morphology bridges phonology and orthography: Insights into                                                                        | LSHSS        |

|                                                                                             |                                                                                                                                                |              |
|---------------------------------------------------------------------------------------------|------------------------------------------------------------------------------------------------------------------------------------------------|--------------|
|                                                                                             | the development of word-specific spellings by superior, average, and poor spellers                                                             |              |
| Baiduc, R. R., Mullervy, S., Berry, C. M., Brumbach, S., Prabhu, S., & Vance, E. A.         | An exploratory study of early auditory evoked potentials in cannabis smokers                                                                   | AJA          |
| Bailey, D. J., Nessler, C., Berggren, K. N., & Wambaugh, J. L.                              | An aphasia treatment for verbs with low concreteness: A pilot study                                                                            | AJSLP        |
| Bandstra, N. F., Huston, P. L., Zvonek, K., Heinz, C., & Piccione, E.                       | Outcomes for feeding tube-dependent children with oral aversion in an intensive interdisciplinary treatment program                            | JSLHR        |
| Bangert K. J. & Finestack, L. H.                                                            | Linguistic maze production by children and adolescents with attention-deficit/hyperactivity disorder                                           | JSLHR        |
| Barber, A. B., Swineford, L., Cook, C., & Belew, A.                                         | Effects of project impact parent-mediated intervention on the spoken language of young children with autism spectrum disorder                  | Perspectives |
| Barbosa, B. A., Coles-White, D., Regal D., & Kijai, J.                                      | Analysis of language errors in speakers who are bilingual under quiet and background noise conditions                                          | Perspectives |
| Barokova, M. D., Hassan, S., Lee, C., Xu, M., & Tager-Flusberg, H.                          | A comparison of natural language samples collected from minimally and low-verbal children and adolescents with autism by parents and examiners | JSLHR        |
| Bartolome, R., Kaneko-Tarui, T., Maron, J., & Zimmerman, E.                                 | The utility of speech-language biomarkers to predict oral feeding outcomes in the premature newborn                                            | AJSLP        |
| Barton-Hulsey, A., Lorang, E., Renfus, K., & Sterling, A.                                   | Maternal input and child language comprehension during book reading in children with Down syndrome                                             | AJSLP        |
| Bauerly, K. R., & Mefferd, A.                                                               | Effects of attentional focus on speech motor control in adults who stutter and its relationship to social stress: A pilot project              | Perspectives |
| Beall, J., Hill, E. G., Armeson, K., Garand, K. L. F., Davidson, K. H., & Martin-Harris, B. | Classification of physiologic swallowing impairment severity: A latent class analysis of modified barium swallow impairment profile scores     | AJSLP        |
| Beamer, S., Gagne, C., Chada, N., Mehta, H., Piper, S., Wong, G., & Davila, G.              | Effectiveness of hearing loss prevention education for active duty military personnel: A preliminary study                                     | Perspectives |

|                                                                 |                                                                                                                                                      |              |
|-----------------------------------------------------------------|------------------------------------------------------------------------------------------------------------------------------------------------------|--------------|
| Bedore, L. M., Peña, E. D., Fiestas, C., & Lugo-Neris, M. J.    | Language and literacy together: supporting grammatical development in dual language learners with risk for language and learning difficulties        | LSHSS        |
| Behrman, A., Cody, J., Elandary, S., Flom, P., & Chitnis, S.    | The effect of SPEAK OUT! and The LOUD Crowd on dysarthria due to Parkinson's disease                                                                 | AJSLP        |
| Behrman, A., Ferguson, S. H., & Flom, P.                        | The effects of clear speech on American English listener perception of Spanish-accented and native English speech                                    | Perspectives |
| Beita-Ell, C., & Boyle, M. P.                                   | School-based speech-language pathologists' perceived self-efficacy in conducting multidimensional treatment with children who stutter                | LSHSS        |
| Benham, S., & Goffman, L.                                       | Lexical-semantic cues induce sound pattern stability in children with developmental language disorder                                                | JSLHR        |
| Benway, N. R., & Preston, J. L.                                 | Differences between school-age children with apraxia of speech and other speech sound disorders on multisyllable repetition                          | Perspectives |
| Bharadwaj, S.V., & Barlow, W.                                   | Reading outcomes in elementary school-age children with hearing loss who use listening and spoken language: A preliminary report                     | Perspectives |
| Bhutada, A. M., Dey, R., Martin-Harris, B., & Garand, K. L.     | Factors influencing initiation of pharyngeal swallow in healthy adults                                                                               | AJSLP        |
| Biller, M. F., & Johnson, C. J.                                 | Examining useful spoken language in a minimally verbal child with autism spectrum disorder: A descriptive clinical single-case study                 | AJSLP        |
| Bilodeau, M., Jacobson, G. P., Roberts, R. A., & Hatton, K.     | Short communication: The belly-tendon derivation yields superior ocular vestibular evoked myogenic potential amplitudes in a normal pediatric sample | AJA          |
| Bislick, L.                                                     | A phonomotor approach to apraxia of speech treatment                                                                                                 | AJSLP        |
| Blank, A., Frush Holt, R., Pisoni, D. B., & Kronenberger, W. G. | Associations between parenting stress, language comprehension, and inhibitory control in children with hearing loss                                  | JSLHR        |
| Bonino, A. Y., Wiens, A., Nightengale, E. C., & Vance, E. A.    | Interrater reliability for a two-interval, observer-based procedure for measuring hearing in young children                                          | AJA          |

|                                                                                                    |                                                                                                                                                                             |              |
|----------------------------------------------------------------------------------------------------|-----------------------------------------------------------------------------------------------------------------------------------------------------------------------------|--------------|
| Borrie, S. A., Barrett, T. S., Liss, J. M., & Berisha, V.                                          | Sync pending: Characterizing conversational entrainment in dysarthria using a multidimensional, clinically informed approach                                                | JSLHR        |
| Borrie, S. A., Wynn, C. J., Berisha, V., Lubold, N., Willi, M. M., Coelho, C. A., & Barrett, T. S. | Conversational coordination of articulation responds to context: A clinical test case with traumatic brain injury                                                           | JSLHR        |
| Bosen, A.K., & Barry, M.F.                                                                         | Serial recall predicts vocoded sentence recognition across spectral resolutions                                                                                             | JSLHR        |
| Bourque, K. S. & Goldstein, H.                                                                     | Expanding communication modalities and functions for preschoolers with autism spectrum disorder: Secondary analysis of a peer partner speech-generating device intervention | JSLHR        |
| Bowles, R. P., Justice, L. M., Khan, K. S., Piasta, S. B., Skibbe, L. E., & Foster, T. D.          | Development of the Narrative Assessment Protocol-2: A tool for examining young children's narrative skill                                                                   | LSHSS        |
| Brady, N. C., Fleming, K., Bredin-Oja, S. L., Fielding-Gebhardt, H., & Warren, S. F.               | Language development from early childhood to adolescence in youths with Fragile X syndrome                                                                                  | JSLHR        |
| Bramhall, N. F., Niemczak, C. E., Kampel, S. D., Billings, C. J., & McMillan, G. P.                | Evoked potentials reveal noise exposure-related central auditory changes despite normal audiograms                                                                          | AJA          |
| Brandel, J.                                                                                        | Speech-language pathology services in the schools: A follow-up 9 years later                                                                                                | LSHSS        |
| Briley, P. M., & Merlo, S.                                                                         | Presence of allergies and their impact on sleep in children who stutter                                                                                                     | Perspectives |
| Brosseau-Lapr , F., & Schumaker, J.                                                                | Perception of correctly and incorrectly produced words in children with and without phonological speech sound disorders                                                     | JSLHR        |
| Brosseau-Lapr , F., Schumaker, J., & Kluender, K. R.                                               | Perception of medial consonants by preschoolers with and without speech sound disorders                                                                                     | JSLHR        |
| Brosseau-Lapr , F., Schumaker, J., & Kluender, K. R.                                               | Perception of medial consonants by children with and without speech and language disorders: A preliminary study                                                             | AJSLP        |
| Brosseau-Lapr , F., & Kim, W. H.                                                                   | Identification of foreign-accented words in preschoolers with and without speech sound disorders                                                                            | JSLHR        |

|                                                                                                |                                                                                                                                          |              |
|------------------------------------------------------------------------------------------------|------------------------------------------------------------------------------------------------------------------------------------------|--------------|
| Brown, J., & Knollman-Porter, K.                                                               | Continuum of care following sports-related concussion                                                                                    | AJSLP        |
| Brown, K. A., & Spencer, K. A.                                                                 | The relationship between speech characteristics and motor subtypes of Parkinson's disease                                                | AJSLP        |
| Buckley, D. P., Cadiz, M. D., Eadie, T. L., & Stepp, C. E.                                     | Acoustic model of perceived overall severity of dysphonia in adductor-type laryngeal dystonia                                            | JSLHR        |
| Buckley, P. C., Murza, K. A., & Cassel, T.                                                     | Perceptions of a collaborative professional learning program: Seeing the "bigger picture"                                                | Perspectives |
| Burden, R. S., Galloway, L. N., Rothpletz, A. M., Glasheen, K. A., & Preminger, J. E.          | The development of an internet-based decision coaching guide to encourage audiology care: The results of a participatory design approach | AJA          |
| Burton, J. M., Creaghead, N. A., Silbert, N., Breit-Smith, A., Duncan, A. W., & Grether, S. M. | Social communication and structural language of girls with high-functioning autism spectrum disorder                                     | LSHSS        |
| Byrd, C. T., Werle, D., & St. Louis, K. O.                                                     | Speech-language pathologists' comfort level with use of term "stuttering" during evaluations                                             | AJSLP        |
| Caesar, L. G., & Kerins, M.                                                                    | Language and literacy predictors of dialect density among school-age African American children from two geographic regions               | LSHSS        |
| Caesar, L. G., & Kitila, M.                                                                    | Speech-language pathologists' perceptions of their preparation and confidence for providing dysphagia services                           | Perspectives |
| Calandruccio, L., Porter, H. L., Leibold, L. J., & Buss, E.                                    | The clear-speech benefit for school-age children: Speech-in-noise and speech-in-speech recognition                                       | JSLHR        |
| Campbell, J., Nielson, M., LaBrec, Al., & Bean, C.                                             | Sensory inhibition is related to variable speech perception in noise in adults with normal hearing                                       | JSLHR        |
| Capone Singletona, N., & Anderson, L.                                                          | Making object shape explicit for toddlers with late language emergence                                                                   | JSLHR        |
| Carl, M., Kent, R. D., Levy, E. S., & Whalen, D. H.                                            | Vowel acoustics and speech intelligibility in young adults with Down syndrome                                                            | JSLHR        |

|                                                                                                          |                                                                                                                                                                                                           |              |
|----------------------------------------------------------------------------------------------------------|-----------------------------------------------------------------------------------------------------------------------------------------------------------------------------------------------------------|--------------|
| Case, J., & Grigos, M. I.                                                                                | A framework of motoric complexity: An investigation in children with typical and impaired speech development                                                                                              | JSLHR        |
| Cavanaugh, R., & Haley, K.L.                                                                             | Subjective communication difficulties in very mild aphasia                                                                                                                                                | AJSLP        |
| Chandregowda, A.                                                                                         | Incidental diagnosis of primary progressive aphasia in the inpatient setting: A note to raise clinical awareness                                                                                          | Perspectives |
| Chang, W. Z. D., & Bourgeois, M. S.                                                                      | Effects of visual aids for end-of-life care on decisional capacity of people with dementia                                                                                                                | AJSLP        |
| Channell, M. M.                                                                                          | Cross-sectional trajectories of mental state language development in children with Down syndrome                                                                                                          | AJSLP        |
| Chiu, Y.-F., & Neel, A.                                                                                  | Predicting intelligibility deficits in Parkinson's disease with perceptual speech ratings                                                                                                                 | JSLHR        |
| Christopoulos, T.T., & Kean, J.                                                                          | General education teachers' contribution to the identification of children with language disorders                                                                                                        | Perspectives |
| Chung, H.                                                                                                | Acquisition and acoustic patterns of southern American English /l/ in young children                                                                                                                      | JSLHR        |
| Clark, H. M., Utianski, R. L., Duffy, J. R., Starnd, E. A., Botha, H., Josephs, K. A., & Whitwell, J. L. | Western Aphasia Battery-Revised profiles in primary progressive aphasia and primary progressive apraxia of speech                                                                                         | AJSLP        |
| Clarkea, K. A., & Williams, D. L.                                                                        | Instruction using augmentative and alternative communication supports: Description of current practices by speech-language pathologists who work with children with autism spectrum disorder              | AJSLP        |
| Conlon, E. L., Braun, E. J., Babbitt, E. M., & Cherney, L. R.                                            | Treatment fidelity procedures for an aphasia intervention within a randomized controlled trial: Design, feasibility, and results                                                                          | AJSLP        |
| Cook, L. G., Caulkins, N. N., & Chapman, S. B.                                                           | A strategic memory advanced reasoning training approach for enhancing higher order cognitive functioning following sports- and recreation-related mild traumatic brain injury in youth using telepractice | Perspectives |

|                                                                                                                                     |                                                                                                                                                             |              |
|-------------------------------------------------------------------------------------------------------------------------------------|-------------------------------------------------------------------------------------------------------------------------------------------------------------|--------------|
| Cox, S. R., Milillo, S., & Maman, Z. S.                                                                                             | Voice characteristics of female college athletes: A pilot study                                                                                             | Perspectives |
| Crais, E., & Savage, M.H.                                                                                                           | Communication sciences and disorders PhD graduates' perceptions of their PhD program                                                                        | Perspectives |
| Criter, R. E., & Gustavson, M.                                                                                                      | Subjective hearing difficulty and fall risk                                                                                                                 | AJA          |
| Croft, R. L., & Byrd, C. T.                                                                                                         | Self-compassion and quality of life in adults who stutter                                                                                                   | AJSLP        |
| Cruickshanks, K. J., Nondahl, D. M., Fischer, M. E., Schubert, C. R., & Tweed, T. S.                                                | A novel method for classifying hearing impairment in epidemiological studies of aging: The Wisconsin Age-Related Hearing Impairment Classification Scale    | AJA          |
| Cunningham, K. T. & Haley, K. T.                                                                                                    | Measuring lexical diversity for discourse analysis in aphasia: Moving-average type-token ratio and word information measure                                 | JSLHR        |
| Curtis, J. A., Dakin, A. E., & Troche, M. S.                                                                                        | Respiratory-swallow coordination training and voluntary cough skill training: A single-subject treatment study in a person with Parkinson's disease         | JSLHR        |
| Curtis, J. A., Seikaly, Z. N., & Troche, M. S.                                                                                      | Respiratory-swallow coordination training improves swallowing safety and efficiency in a person with anoxic brain injury                                    | AJSLP        |
| Cycyk, L. M., Moore, H. W., De Anda, S., Huerta, L., Méndez, S., Patton, C., & Bourret, C.                                          | Adaptation of a caregiver-implemented naturalistic communication intervention for Spanish-speaking families of Mexican immigrant descent: A promising start | AJSLP        |
| Cycyk, L. M. & Huerta L.                                                                                                            | Exploring the cultural validity of parent-implemented naturalistic language intervention procedures for families from Spanish-speaking Latinx homes         | AJSLP        |
| D'Onofrio, K., Richards, V., & Gifford, R.                                                                                          | Spatial release from informational and energetic masking in bimodal and bilateral cochlear implant users                                                    | JSLHR        |
| Daliri, A., Chao, S. C., & Fitzgerald, L. C.                                                                                        | Compensatory responses to formant perturbations proportionally decrease as perturbations increase                                                           | JSLHR        |
| Daliri, A., Heller Murray, E. S., Blood, A. J., Burns, J., Noordzij, J. P., Nieto-Castanon, A., Tourville, J. A., & Guenther, F. H. | Auditory feedback control mechanisms do not contribute to cortical hyperactivity within the voice production network in adductor spasmodic dysphonia        | JSLHR        |



|                                                                                         |                                                                                                                                                                   |              |
|-----------------------------------------------------------------------------------------|-------------------------------------------------------------------------------------------------------------------------------------------------------------------|--------------|
| Dam, Q., Pham, G., Potapova, I., & Pruitt-Lord, S.                                      | Grammatical characteristics of Vietnamese and English in developing bilingual children                                                                            | AJSLP        |
| Daney, S., Pakulski, L. A., Diehm, E. A., & Glassman, J.                                | Development of a hearing conservation program for elementary schools                                                                                              | Perspectives |
| Darling-White, M. & Huber, J. E.                                                        | The impact of Parkinson's disease on breath pauses and their relationship to speech impairment: A longitudinal study                                              | AJSLP        |
| Daugherty, B., Bittner, M., Ocampo, A., Lavay, B., Chevalier, S., Jimenez, S., & Le, A. | Interprofessional collaboration: Training preservice adapted physical education teachers to facilitate peer engagement among children with disabilities           | Perspectives |
| Davis, S.                                                                               | A preliminary study on the need for structured vocal seminars for fitness instructors to prevent voice disorders and improve overall voice use during instruction | Perspectives |
| De Anda, S., Blossom, M., & Abel, A. D.                                                 | Cross-morpheme generalization using a complexity approach in school-age children                                                                                  | JSLHR        |
| DeDe, G., & Salis, C.                                                                   | Temporal and episodic analyses of the story of Cinderella in latent aphasia                                                                                       | AJSLP        |
| de Diego-Lázaro, B., Winn, K., & Restrepo, M. A.                                        | Cultural competence and self-efficacy after study abroad experiences                                                                                              | AJSLP        |
| DeJarnette, K. M. & Wegner, J. R.                                                       | Preservice education in augmentative and alternative communication: An update                                                                                     | Perspectives |
| Dekhtyar, M., Braun, E. J., Billot, A., Foo, L., & Kiran, S.                            | Videoconference administration of the Western Aphasia Battery-Revised: Feasibility and validity                                                                   | AJSLP        |
| Desai, R. V., & Namasivayam-MacDonald, A.                                               | Practice patterns of speech-language pathologists managing dysphagia in dementia: A cross-sectional survey in the United States                                   | Perspectives |
| Desjardins, J. L., Bangert, A., & Gomez, N.                                             | What does language have to do with it? The impact of age and bilingual experience on inhibitory control in an auditory dichotic listening task                    | JSLHR        |
| DiNino, M., Arenberg, J. G., Duchon, A. L., & Winn, M. B.                               | Effects of age and cochlear implantation on spectrally cued speech categorization                                                                                 | JSLHR        |



|                                                                                                                                                      |                                                                                                                                                                                                                 |              |
|------------------------------------------------------------------------------------------------------------------------------------------------------|-----------------------------------------------------------------------------------------------------------------------------------------------------------------------------------------------------------------|--------------|
| Dillard, L. K., Fischer, M. E., Pinto, A., Klein, B. E. K., Paulsen, A. J., Schubert, C. R., Tsai, M. Y., Tweed, T. S., & Cruickshanks, K. J.        | Longitudinal decline on the dichotic digits test                                                                                                                                                                | AJA          |
| Dilley, L., Lehet, M., Wieland, E. A., Arjmandi, M. K., Kondaurova, M., Wang, Y., ... & Bergeson, T.                                                 | Individual differences in mothers' spontaneous infant-directed speech predict language attainment in children with cochlear implants                                                                            | JSLHR        |
| Dillon, M. T., Buss, E., O'Connell, B. P., Rooth, M. A., King, E. R., Bucker, A. L., Deres, E. J., McCarthy, S. A., Pillsbury, H. C., & Brown, K. D. | Low-frequency hearing preservation with long electrode arrays: Inclusion of unaided hearing threshold assessment in the postoperative test battery                                                              | AJA          |
| Domsch, C., Stiritz, L., & Huff, J.                                                                                                                  | Cultural awareness of students in communication sciences and disorders: A mixed-methods study                                                                                                                   | Perspectives |
| Donohue, C. & Coyle, J. L.                                                                                                                           | The safety, tolerability, and impact of respiratory-swallow coordination training and expiratory muscle strength training on pulmonary, cough, and swallow function surrogates in amyotrophic lateral sclerosis | Perspectives |
| Donohue, C. & Coyle, J. L.                                                                                                                           | How important is randomization of swallows during kinematic analyses of swallow function?                                                                                                                       | AJSLP        |
| Doud, A. K., Hoepner, J. K., & Holland, A. L.                                                                                                        | A survey of counseling curricula among accredited communication sciences and disorders graduate student programs                                                                                                | AJSLP        |
| Douglas, S. N., West, P., & Kammes, R.                                                                                                               | The training experiences of augmentative and alternative communication practitioners in one midwestern state                                                                                                    | Perspectives |
| Dunn, C., Miller, S. E., Schafer, E. C., Silva, C., Gifford, R. H., & Grisel, J. J.                                                                  | Benefits of a hearing registry: Cochlear implant candidacy in quiet versus noise in 1,611 patients                                                                                                              | AJA          |
| Dutta, M., Murray, L. L., Miller, W., Innis, I., & Newman, S.                                                                                        | Cognitive-linguistic functions in adults with epilepsy: Preliminary electrophysiological and behavioral findings                                                                                                | JSLHR        |
| Elkins, E., Harvey, A., Hillyer, J., Hazlewood,                                                                                                      | Estimating real-world performance of percutaneously coupled bone-conduction                                                                                                                                     | AJA          |

|                                                                                                                                      |                                                                                                                                                               |              |
|--------------------------------------------------------------------------------------------------------------------------------------|---------------------------------------------------------------------------------------------------------------------------------------------------------------|--------------|
| C., Watson, S., & Parbery-Clark, A.                                                                                                  | device users with severe-to-profound unilateral hearing loss                                                                                                  |              |
| Engelstad, A., Calliope Holingue, C., & Landa, R. J.                                                                                 | Early achievements for education settings: An embedded teacher-implemented social communication intervention for preschoolers with autism spectrum disorder   | Perspectives |
| Erickson-DiRenzo, E., Sung, C. K., Ho, A. L., & Halpern, C. H.                                                                       | Intraoperative evaluation of essential vocal tremor in deep brain stimulation surgery                                                                         | AJSLP        |
| Espinoza, V. M., Mehta, D. D., Van Stan, J. H., Hillman, R. E., & Zanartu, M.                                                        | Glottal aerodynamics estimated from neck-surface vibration in women with phonotraumatic and nonphonotraumatic vocal hyperfunction                             | JSLHR        |
| Europa, E., Iaccarino, L., Perry, D. C., Weis, E., Welch, A. E., Rabinovici, G. D., Miller, B. L., Gorno-Tempini, M. L., & Henry, M. | Diagnostic assessment in primary progressive aphasia: An illustrative case example                                                                            | AJSLP        |
| Evans, W. S., Hula, W. D., Quique, Y., & Starns, J. J.                                                                               | How much time do people with aphasia need to respond during picture naming? Estimating optimal response time cutoffs using a multinomial ex-gaussian approach | JSLHR        |
| Everett, A., Wong, A., Cone, B., & Marrone, N.                                                                                       | Sensitivity and specificity of pure-tone and subjective hearing screenings using Spanish-language questions                                                   | AJA          |
| Farquharson, K., & Babeu, C.                                                                                                         | Examining caregiver knowledge of shared book reading practices for infants and toddlers who are deaf or hard of hearing: A pilot study                        | Perspectives |
| Farquharson, K., Tambryraja, S. R., & Justice, L. M.                                                                                 | Contributions to gain in speech sound production accuracy for children with speech sound disorders: Exploring child and therapy factors                       | LSHSS        |
| Felicetti, C., Richardson, K., & Mansolillo, A.                                                                                      | Dysphagia management in schools: A survey of speech-language pathologists                                                                                     | Perspectives |
| Feuerstein, J. L., & Olswang, L. B.                                                                                                  | A randomized controlled trial investigating online training for prelinguistic communication                                                                   | JSLHR        |
| Finestack, L., Engman, J., Huang, T., Bangert, K. J., & Bader, K.                                                                    | Evaluation of a combined explicit-implicit approach to teach grammatical forms to children with grammatical weaknesses                                        | AJSLP        |

|                                                             |                                                                                                                                                               |              |
|-------------------------------------------------------------|---------------------------------------------------------------------------------------------------------------------------------------------------------------|--------------|
| Flagge, A. G., Davis, T., & Henbest, V. S.                  | The contribution of frequency discrimination ability to auditory temporal patterning tests in children                                                        | JSLHR        |
| Flurie, M., Ungrady, M., & Reilly, J.                       | Evaluating a maintenance-based treatment approach to preventing lexical dropout in progressive anomia                                                         | JSLHR        |
| Fogerty, D., Madorskiy, R., Ahlstrom, J. B., & Dubno, J. R. | Comparing speech recognition for listeners with normal and impaired hearing: Simulations for controlling differences in speech levels and spectral shape      | JSLHR        |
| Fowler, C. G., Dallapiazza, M., & Hadsell, K. T.            | Vestibular function and motion sickness susceptibility: Videonystagmographic evidence from oculomotor and caloric tests                                       | AJA          |
| Frazier, K. F., Collier, J., & Glade, R.                    | A case study: Unique challenges of an adolescent female with autism spectrum disorder                                                                         | Perspectives |
| Frazier, K. F., & Howard, K.                                | Perspectives of speech-language pathologists and school counselors on the nature and treatment of selective mutism                                            | Perspectives |
| Friedman, L., Lorang, E., Hilvert, E., & Sterling, A.       | "Are we done yet?" Question-asking in boys with Fragile X syndrome and idiopathic autism spectrum disorder                                                    | JSLHR        |
| Fromm, D., MacWhinney, B., & Thompson, C. K.                | Automation of the Northwestern Narrative Language Analysis System                                                                                             | JSLHR        |
| Fuhrmeister, P., Schlemmer, B., & Myers, E.B.               | Adults show initial advantages over children in learning difficult nonnative speech sounds                                                                    | JSLHR        |
| Fulcher-Rood, K., Castilla-Earls, A., & Higginbotham, J.    | What does evidence-based practice mean to you? A follow-up study examining school-based speech-language pathologists' perspectives on evidence-based practice | AJSLP        |
| Gaeta, L.                                                   | Survey of hearing health during the covid-19 pandemic: Implications for service delivery                                                                      | AJA          |
| Gallagher, J. F., & Hoover, J. R.                           | Measure what you treat: Using language sample analysis for grammatical outcome measures in children with developmental language disorder                      | Perspectives |
| Garand, K. L., Thomas, T., & Dey, R.                        | Factors influencing presence or absence of laterality during pharyngeal bolus clearance                                                                       | Perspectives |

|                                                                                        |                                                                                                                                                                                           |              |
|----------------------------------------------------------------------------------------|-------------------------------------------------------------------------------------------------------------------------------------------------------------------------------------------|--------------|
| Garbarino, J., Dow-Burger, K., & Ratner, N. B.                                         | Implementation of the Program for the Education and Enrichment of Relational Skills (PEERS®) social skills intervention in a university-based communication sciences and disorders clinic | Perspectives |
| George, B. V., & Cone, B.                                                              | Perceptual and electrophysiological correlates of fixed versus moving sound source lateralization                                                                                         | JSLHR        |
| Gerwin, K. L., & Weber, C.                                                             | Neural indices mediating rhyme discrimination differ for some young children who stutter regardless of eventual recovery or persistence                                                   | JSLHR        |
| Gevarter, C., Horan, K., & Sigafoos, J.                                                | Teaching preschoolers with autism to use different speech-generating device display formats during play: Intervention and secondary factors                                               | LSHSS        |
| Giess, S., Bland, L. E., & Farrell, C. C.                                              | School-based practicum: Exploring the experiences of student clinicians, supervisors, and new employees                                                                                   | Perspectives |
| Girolamo, T. M., Rice, M. L., & Warren, S. F.                                          | Assessment of language abilities in minority adolescents and young adults with autism spectrum disorder and extensive special education needs: A pilot study                              | AJSLP        |
| Gkalitsiou, Z., Byrd, C., & Griffin, Z.                                                | Executive control in adults who stutter: The antisaccade task                                                                                                                             | JSLHR        |
| Gladfelter, A., & VanZuiden, C.                                                        | The influence of language context on repetitive speech use in children with autism spectrum disorder                                                                                      | AJSLP        |
| Goodwin, A. P., Petscher, Y., & Tock, J.                                               | Morphological supports: Investigating differences in how morphological knowledge supports reading comprehension for middle school students with limited reading vocabulary                | LSHSS        |
| Gordon, J. K.                                                                          | Factor analysis of spontaneous speech in aphasia                                                                                                                                          | JSLHR        |
| Gray, S., Lancaster, H., Alt, M., Hogan, T. P., Green, S., Levy, R., & Cowan, N.       | The structure of word learning in young school-age children                                                                                                                               | JSLHR        |
| Greenslade, K. J., Stuart, J. E. B., Richardson, J. D., Dalton, S. G., & Ramage, A. E. | Macrostructural analyses of Cinderella narratives in a large nonclinical sample                                                                                                           | AJSLP        |

|                                                                                  |                                                                                                                                      |              |
|----------------------------------------------------------------------------------|--------------------------------------------------------------------------------------------------------------------------------------|--------------|
| Griffin, A. M., Poissant, S. F., & Freyman, R. L.                                | Auditory comprehension in school-aged children with normal hearing and with unilateral hearing loss                                  | LSHSS        |
| Groll, M. D., McKenna, V. S., Hablani, S., & Stepp, C. E.                        | Formant-estimated vocal tract length and extrinsic laryngeal muscle activation during modulation of vocal effort in healthy speakers | JSLHR        |
| Guiberson, M. M., & Rodríguez, B. L.                                             | Working memory and linguistic performance of dual language learners with and without developmental language disorders                | AJSLP        |
| Gurevich, N., Ramrattan, H., Kubalanza, M., Osmelak, D. R., & Boese, J.          | Recommending hearing assessment for individuals with dementia: A survey of medical professionals                                     | Perspectives |
| Haenssler, A. E., Fang, X., & Perry, J. L.                                       | Effective velopharyngeal ratio: A more clinically relevant measure of velopharyngeal function                                        | JSLHR        |
| Hall, J., & Plante, E.                                                           | Data-informed guideposts for decision making in enhanced conversational recast treatment                                             | AJSLP        |
| Harmon, T. G., Jacks, A., Haley, K. L., & Bailliard, A.                          | How responsiveness from a communication partner affects story retell in aphasia: Quantitative and qualitative findings               | AJSLP        |
| Harvey, J., Farquharson, K., Schneider-Cline, W., Bush, E., & Yeager Pelatti, C. | Describing the composition of individualized education plans for students with traumatic brain injury                                | LSHSS        |
| Hashimoto, N.                                                                    | The use of written naming and repetition to treat naming deficits in aphasia                                                         | AJSLP        |
| Heape, A., Causey, B., Lloyd, T., & Jeter, S.                                    | Ageism among graduate students in communication sciences and disorders: A longitudinal analysis                                      | Perspectives |
| Heller Murray, E. S., Segina, R. K., Woodnorth, G. H., & Stepp, C. E.            | Relative fundamental frequency in children with and without vocal fold nodules                                                       | JSLHR        |
| Helou, L.B., Jennings, J.R., Rosen, C.A., Wang, W., & Abbott, K.V.               | Intrinsic laryngeal muscle response to a public speech preparation stressor: Personality and autonomic predictors                    | JSLHR        |
| Henbest, V. S., Fitton, L., Werfel, K. L., & Apel, K.                            | The relation between linguistic awareness skills and spelling in adults: A comparison among scoring procedures                       | JSLHR        |

|                                                                                |                                                                                                                                                                                                      |              |
|--------------------------------------------------------------------------------|------------------------------------------------------------------------------------------------------------------------------------------------------------------------------------------------------|--------------|
| Hendricks, A. E., & Adlof, S. M.                                               | Production of morphosyntax within and across different dialects of American English                                                                                                                  | JSLHR        |
| Hessling, A., & Schuele, C. M.                                                 | Individualized narrative intervention for school-age children with specific language impairment                                                                                                      | LSHSS        |
| Hilger, A., Cole, J., Kim, J. H., Lester-Smith, R. A., & Larson, C.            | The effect of pitch auditory feedback perturbations on the production of anticipatory phrasal prominence and boundary                                                                                | JSLHR        |
| Hilvert, E., Hoover, J., Sterling, A., & Schroeder, S.                         | Comparing tense and agreement productivity in boys with Fragile X syndrome, children with developmental language disorder, and children with typical development                                     | JSLHR        |
| Hitchcock, E. R., Cabbage, K. L., Swartz, M. T., & Carrell, T. D.              | Measuring speech perception using the wide-range acoustic accuracy scale: Preliminary findings                                                                                                       | Perspectives |
| Hollo, A., Staubitz, J. L., & Chow, J. C.                                      | Applying generalizability theory to optimize analysis of spontaneous teacher talk in elementary classrooms                                                                                           | JSLHR        |
| Hopkins-Rossabi, T., Rowe, M., McGrattan, K., Rossabi, S., & Martin-Harris, B. | Respiratory-swallow training methods: Accuracy of automated detection of swallow onset, respiratory phase, lung volume at swallow onset, and real-time performance feedback tested in healthy adults | AJSLP        |
| Hosbach-Cannon, C.J., Lowell, S.Y., Colton, R.H., Kelley, R.T., & Bao, X.      | Assessment of tongue position and laryngeal height in two professional voice populations                                                                                                             | JSLHR        |
| Huang, T., & Finestack, L.                                                     | Comparing morphosyntactic profiles of children with developmental language disorder or language disorder associated with autism spectrum disorder                                                    | AJSLP        |
| Hula, W. D., Fergadiotis, G., Swiderski, A. M., Silkes, J. P., & Kellough, S.  | Empirical evaluation of computer-adaptive alternate short forms for the assessment of anomia severity                                                                                                | JSLHR        |
| Humes, L.E.                                                                    | Associations between measures of auditory function and brief assessments of cognition                                                                                                                | AJA          |
| Hurley, A., Willis, M., Guidry, M., Bode, D.,                                  | A program review of Head Start and elementary school hearing screenings                                                                                                                              | LSHSS        |

|                                                                                 |                                                                                                                                                                                    |              |
|---------------------------------------------------------------------------------|------------------------------------------------------------------------------------------------------------------------------------------------------------------------------------|--------------|
| Corneille, M. L., & Mills, S.                                                   |                                                                                                                                                                                    |              |
| Hustad, K. C., Mahr, T. J., Broman, A. T., & Rathouz, P. J.                     | Longitudinal growth in single-word intelligibility among children with cerebral palsy from 24 to 96 months of age: Effects of speech-language profile group membership on outcomes | JSLHR        |
| Hustad, K. C., Mahr, T., Natzke, F. E. M., & Rathouz, P. J.                     | Development of speech intelligibility between 30 and 47 months in typically developing children: A cross-sectional study of growth                                                 | JSLHR        |
| Hux, K., Brown, J. A., Wallace, S., Knollman-Porter, K., Saylor, A., & Lapp, E. | Effect of text-to-speech rate on reading comprehension by adults with aphasia                                                                                                      | AJSLP        |
| Iglehart, F.                                                                    | Speech perception in classroom acoustics by children with hearing loss and wearing hearing aids                                                                                    | AJA          |
| Ijalba, E., Bustos, A., & Romero, S.                                            | Phonological-orthographic deficits in developmental dyslexia in three Spanish-English bilingual students                                                                           | AJSLP        |
| Jackson, E.S., Gracco, V., & Zebrowski, P.M.                                    | Eliciting stuttering in laboratory contexts                                                                                                                                        | JSLHR        |
| Jahn, K. N., Bergan, M. D., & Arenberg, J. G.                                   | Auditory detection thresholds and cochlear resistivity differ between pediatric cochlear implant listeners with enlarged vestibular aqueduct and those with connexin-26 mutations  | AJA          |
| Jakomin, J. R., Ziegler, A., Rio, C., & Suddarth, R.                            | Opportunities to learn transgender voice and communication therapy in graduate speech-language pathology education: Preliminary e-survey findings                                  | Perspectives |
| Janky, K. L. & Patterson, J.                                                    | The relationship between rotary chair and video head impulse testing in children and young adults with cochlear implants                                                           | AJA          |
| Jasso, J., & Potratz, J. R.                                                     | Assessing speech sound disorders in school-age children from diverse language backgrounds: A tutorial with three case studies                                                      | Perspectives |
| Jasso, J., McMillen, S., Anaya, J. B., Bedore, L. M., & Pena, E. D.             | The utility of an English semantics measure for identifying developmental language disorder in Spanish-English bilinguals                                                          | AJSLP        |



|                                                                                                  |                                                                                                                                                                 |              |
|--------------------------------------------------------------------------------------------------|-----------------------------------------------------------------------------------------------------------------------------------------------------------------|--------------|
| Jensen, J., Vyas, D., Urbanski, D., Garudadri, H., Chipar, O., & Wu, Y.                          | Common configurations of real-ear aided response targets prescribed by NAL-NL2 for older adults with mild-to-moderate hearing loss                              | AJA          |
| Johnson, E. M., Morgan, S. D., & Hargus Ferguson, S.                                             | Does time compression decrease intelligibility for female talkers more than for male talkers?                                                                   | JSLHR        |
| Jones, M. K., Kraus, N., Bonacina, S., Nicol, T., Otto-Meyer, S., & Roberts, M. Y.               | Auditory processing differences in toddlers with autism spectrum disorder                                                                                       | JSLHR        |
| Jung, J. & Houston, D.                                                                           | The relationship between the onset of canonical syllables and speech perception skills in children with cochlear implants                                       | JSLHR        |
| Jung, J., Reed, J., Wagner, L., Stephens, J., Warner-Czyz, A.D., Uhler, K., & Houston, D.        | Early vocabulary profiles of young deaf children who use cochlear implants                                                                                      | JSLHR        |
| Kan, P. F., Huang, S., Winicour, E., & Yang, J.                                                  | Vocabulary growth: Dual language learners at risk for language impairment                                                                                       | AJSLP        |
| Kan, P. F., Miller, A., Cheung, S., & Brickman, A.                                               | The distributed L1 and L2 language-learning environments of dual language learners across home and school settings                                              | LSHSS        |
| Kang, C. H., & Lott, D. G.                                                                       | Muscle tension dysphagia evaluation and treatment                                                                                                               | Perspectives |
| Kantarcigil, C., Kim, M. K., Chang, T., Craig, B. A., Smith, A., Lee, C. H., & Malandraki, G. A. | Validation of a novel wearable electromyography patch for monitoring submental muscle activity during swallowing: A randomized crossover trial                  | JSLHR        |
| Kao, C., & Zhang, Y.                                                                             | Differential neurobehavioral effects of cross-modal selective priming on phonetic and emotional prosodic information in late second language learners           | JSLHR        |
| Kapa, L. L., & Erikson, J. A.                                                                    | The relationship between word learning and executive function in preschoolers with and without developmental language disorder                                  | JSLHR        |
| Kapa, L. L., Meyers-Denman, C., Plante, E., & Doubleday, K.                                      | Predictors of treatment response for preschool children with developmental language disorder                                                                    | AJSLP        |
| Keffala, B., Scarpino, S., Hammer, C. S., Rodriguez, B., Lopez, L., & Brian Goldstein, B.        | Vocabulary and phonological abilities affect dual language learners' consonant production accuracy within and across languages: A large-scale study of 3- to 6- | AJSLP        |

|                                                                                                                         |                                                                                                                                                  |       |
|-------------------------------------------------------------------------------------------------------------------------|--------------------------------------------------------------------------------------------------------------------------------------------------|-------|
|                                                                                                                         | year-old Spanish-English dual language learners                                                                                                  |       |
| Kelley, E. S., Barker, R. M., Peters-Sanders, L., Madsen, K., Seven, Y., Soto, X., Olsen, W., Hull, K., & Goldstein, H. | Feasible implementation strategies for improving vocabulary knowledge of high-risk preschoolers: Results from a cluster-randomized trial         | JSLHR |
| Kelley, E. S., Hull, G., Eubank, A., & Roettgen, G.                                                                     | Teaching undergraduate clinicians empirically supported practices for preschool vocabulary instruction                                           | LSHSS |
| Kelly, E. M., Singer, C. M., Henderson, J. K., & Shaw, K. O.                                                            | Stuttering practice self-assessment by school speech-language practitioners                                                                      | LSHSS |
| Kennedy, E., & Thibeault, S. L.                                                                                         | Voice-gender incongruence and voice health information-seeking behaviors in the transgender community                                            | AJSLP |
| Kessler, D. M., Wolfe, J., Blanchard, M., & Gifford, R. H.                                                              | Clinical application of spectral modulation detection: Speech recognition benefit for combining a cochlear implant and contralateral hearing aid | JSLHR |
| Kim, H. & Harris Wright, H.                                                                                             | Concurrent validity and reliability of the core lexicon measure as a measure of word retrieval ability in aphasia narratives                     | AJSLP |
| Koerner, T. K., Papesh, M. A., & Gallun, F. J.                                                                          | A questionnaire survey of current rehabilitation practices for adults with normal hearing sensitivity who experience auditory difficulties       | AJA   |
| Koleilat, A., Argue, D. P., Schimmenti, L. A., Ekker, S. C., & Poling, G. L.                                            | The GoAudio quantitative mobile audiology test enhances access to clinical hearing assessments                                                   | AJA   |
| Kotlarek, K. J., Pelland, C. M., Blemker, S. S., Jaskolka, M. S., Fang, X., & Perry, J. L.                              | Asymmetry and positioning of the levator veli palatini muscle in children with repaired cleft palate                                             | JSLHR |
| Kronenberger, W. G., Xu, H., & Pisoni, D. B.                                                                            | Longitudinal development of executive functioning and spoken language skills in preschool-aged children with cochlear implants                   | JSLHR |
| Krueger, B. I. & Storkel, H. L.                                                                                         | Children's response bias and identification of misarticulated words                                                                              | JSLHR |
| Kueser, J. B., & Leonard, L. B.                                                                                         | The effects of frequency and predictability on repetition in children with developmental language disorder                                       | JSLHR |

|                                                                 |                                                                                                                                                |       |
|-----------------------------------------------------------------|------------------------------------------------------------------------------------------------------------------------------------------------|-------|
| Kuruville-Dugdale, M., Salazar, M., Zhang, A., & Mefferd, A. S. | Detection of articulatory deficits in Parkinson's disease: Can systematic manipulations of phonetic complexity help?                           | JSLHR |
| Lam, B. P., & Marquardt, T. P.                                  | The emotional verbal fluency task: A close examination of verbal productivity and lexical-semantic properties                                  | JSLHR |
| Lam, B. P. W., & Sheng, L.                                      | Taxonomic development in young bilingual children: Task matters, and so does scoring method                                                    | AJSLP |
| Lansford, K. L., Borrie, S. A., Barrett, T. S., & Flechaus, C.  | When additional training isn't enough: Further evidence that unpredictable speech inhibits adaptation                                          | JSLHR |
| Lanzi, A., & Bourgeois, M. S.                                   | Structured external memory aid treatment for mild cognitive impairment                                                                         | AJSLP |
| Lanzi, A., Bourgeois, M. S., & Dedrick, R. F.                   | Development and initial validation of the Functional External Memory Aid Tool                                                                  | AJSLP |
| Larson, A. L., Barrett, T. S., & McConnell, S. R.               | Exploring early childhood language environments: A comparison of language use, exposure, and interactions in the home and childcare settings   | LSHSS |
| Larson, C., Kaplan, D., Kaushanskaya, M., & Weismer, S. E.      | Language and inhibition: Predictive relationships in children with language impairment relative to typically developing peers                  | JSLHR |
| Leaman, M. C., & Edmonds, L. A.                                 | "By the way"... How people with aphasia and their communication partners initiate new topics of conversation                                   | AJSLP |
| Lee, B., & Sidtis, D. V. L.                                     | Subcortical involvement in formulaic language: Studies on bilingual individuals with Parkinson's disease                                       | JSLHR |
| Lee, J. B., & Azios, J. H.                                      | Facilitator behaviors leading to engagement and disengagement in aphasia conversation groups                                                   | AJSLP |
| Lee, J., Kim, H., & Jung, Y.                                    | Patterns of misidentified vowels in individuals with dysarthria secondary to amyotrophic lateral sclerosis                                     | JSLHR |
| Lee, J., Rodriguez, E., & Mefferd, A.                           | Direction-specific jaw dysfunction and its impact on tongue movement in individuals with dysarthria secondary to amyotrophic lateral sclerosis | JSLHR |
| Lentz, J. J., & He, Y.                                          | Perceptual dimensions underlying tinnitus-like sounds                                                                                          | JSLHR |

|                                                                                                   |                                                                                                                                                                  |              |
|---------------------------------------------------------------------------------------------------|------------------------------------------------------------------------------------------------------------------------------------------------------------------|--------------|
| Leonard, L. B., Deevy, P., Karpicke, J. D., Christ, S. L., & Kueser, J. B.                        | After initial retrieval practice, more retrieval produces better retention than more study in the word learning of children with developmental language disorder | JSLHR        |
| Lesser, J., & Ebert, K.D.                                                                         | Examining social communication effects of a picture communication board in a child with autism                                                                   | Perspectives |
| Lester-Smith, R. A., Daliri, A., Enos, N., Abur, D., Lupiani, A.A., Letcher, S., & Stepp, C. E.   | The relation of articulatory and vocal auditory-motor control in typical speakers                                                                                | JSLHR        |
| Loeb, D. F., Imbrund, C. M., Lee, J., & Barlow, S. M.                                             | Language, motor, and cognitive outcomes of toddlers who were born preterm                                                                                        | AJSLP        |
| Logan, A. M., Gawlik, A. E., Aden, J. K., Jarvis, N. C., & Dion, G. R.                            | Pharyngoesophageal segment distention across volumes and pathology                                                                                               | JSLHR        |
| Lund, E.                                                                                          | The relation between vocabulary knowledge and phonological awareness in children with cochlear implants                                                          | JSLHR        |
| Lund, E., Miller, C., Douglas, W. M., & Werfel, K.                                                | Teaching vocabulary to improve print knowledge in preschool children with hearing loss                                                                           | Perspectives |
| Lundberg, E. M. H., Chon, S. H., Kates, J., M., Anderson, M. C., & Arehart K. H.                  | The type of noise influences quality ratings for noisy speech in hearing aid users                                                                               | JSLHR        |
| Luo, X., Kolberg, C., Pulling, K. R., & Azuma, T.                                                 | Psychoacoustic and demographic factors for speech recognition of older adult cochlear implant users                                                              | JSLHR        |
| Magimairaj, B. M., Nagaraj, N. K., Sergeev, A. V., & Benafield, N. J.                             | Comparison of auditory, language, memory, and attention abilities in children with and without listening difficulties                                            | AJA          |
| Mahr, T. J., Rathouz, P. J., & Hustad, K. C.                                                      | Longitudinal growth in intelligibility of connected speech from 2 to 8 years in children with cerebral palsy: A novel Bayesian approach                          | JSLHR        |
| Manchaiah, V., Bellon-Harn, M. L., Kelly-Campbell, R. J., Beukes, E. W., Bailey, A., & Pyykko, I. | Media use by older adults with hearing loss: An exploratory survey                                                                                               | AJA          |

|                                                                                                                          |                                                                                                                                                    |              |
|--------------------------------------------------------------------------------------------------------------------------|----------------------------------------------------------------------------------------------------------------------------------------------------|--------------|
| Manchaiah, V., Vlaescu, G., Varadaraj, S., Aronson, E. P., Fagelson, M. A., Munoz, M. F., Andersson, G., & Beukes, E. W. | Features, functionality, and acceptability of internet-based cognitive behavioral therapy for tinnitus in the United States                        | AJA          |
| Mancilla-Martinez, J., Hwang, J. K., Oh, M. H., & Pokowitz, E. L.                                                        | Patterns of development in Spanish-English conceptually scored vocabulary among elementary-age dual language learners                              | JSLHR        |
| Mancini, P. C., Tyler, R. S., Jun, H. J., Wang, T., Ji, H., Stocking, C., Secor, C., Rojas-Roncancio, E., & Witt, S.     | Reliability of the minimum masking level as outcome variable in tinnitus clinical research                                                         | AJA          |
| Mandak, K., Light, J., & McNaughton, D.                                                                                  | Video visual scene displays with dynamic text: Effect on single-word reading by an adolescent with cerebral palsy                                  | Perspectives |
| Mandak, K., Light, J., & McNaughton, D.                                                                                  | The effects of an online training on preservice speech-language pathologists' use of family-centered skills                                        | AJSLP        |
| Manning, B. L., Harpole, A., Harriott, E. M., Postolowicz, K., & Norton, E. S.                                           | Taking language samples home: Feasibility, reliability, and validity of child language samples conducted remotely with video chat versus in-person | JSLHR        |
| Marks, K. L., Lin, J. Z., Burns, J. A., Hron, T. A., Hillman, R. E., & Mehta, D. D.                                      | Estimation of subglottal pressure from neck surface vibration in patients with voice disorders                                                     | JSLHR        |
| Marvin, S., & Thibeault, S.                                                                                              | Pharyngeal versus esophageal stasis: Accuracy of symptom localization                                                                              | AJSLP        |
| Mauszycki, S. C., & Wambaugh, J. L.                                                                                      | Acquired apraxia of speech: Comparison of electropalatography treatment and sound production treatment                                             | AJSLP        |
| McCreery, R. W., Miller, M. K., Buss, E., & Leibold, L. J.                                                               | Cognitive and linguistic contributions to masked speech recognition in children                                                                    | JSLHR        |
| McCreery, R. W., Walker, E. A., Stiles, D. J., Spratford, M., Oleson, J. J., & Lewis, D. E.                              | Audibility-based hearing aid fitting criteria for children with mild bilateral hearing loss                                                        | LSHSS        |
| McDaniel, J., Yoder, P., Estes, A., & Rogers, S. J.                                                                      | Predicting expressive language from early vocalizations in young children with autism spectrum disorder: Which vocal measure is best?              | JSLHR        |

|                                                                                       |                                                                                                                                                                                        |              |
|---------------------------------------------------------------------------------------|----------------------------------------------------------------------------------------------------------------------------------------------------------------------------------------|--------------|
| McFadd, E. D., & Hustad, K. C.                                                        | Communication modes and functions in children with cerebral palsy                                                                                                                      | JSLHR        |
| McGregor, K. K., Eden, N., Arbisi-Kelm, T., & Oleson, J.                              | The fast-mapping abilities of adults with developmental language disorder                                                                                                              | JSLHR        |
| McGuffin, B. J., Liss, J. M., & Daliri A.                                             | The orofacial somatosensory system is modulated during speech planning and production                                                                                                  | JSLHR        |
| McKenna, V. S., Hylkema, J. A., Tardif, M. C., & Stepp, C. E.                         | Voice onset time in individuals with hyperfunctional voice disorders: Evidence for disordered vocal motor control                                                                      | JSLHR        |
| McMillen, S., Griffin, Z. M., Peña, E. D., Bedore, L. M., & Oppenheim, G. M.          | "Did I say cherry?" Error patterns on a blocked cyclic naming task for bilingual children with and without developmental language disorder                                             | JSLHR        |
| Medina, A. M., Almeida, N., Amarante, K., Martinez, N., & Prezzemolo, M.              | Adults who stutter and their motivation for attending stuttering support groups: A pilot study                                                                                         | Perspectives |
| Mefferd, A. S. & Dietrich, M. S.                                                      | Tongue- and jaw-specific articulatory changes and their acoustic consequences in talkers with dysarthria due to amyotrophic lateral sclerosis: Effects of loud, clear, and slow speech | JSLHR        |
| Meigh, K. M., Coburn, E., & Yunusova, Y.                                              | Phoneme and stress programming interact during nonword repetition learning                                                                                                             | JSLHR        |
| Mendel, L. L., Pousson, M. A., Bass, J. K., Coffelt, J. A., Morris, M., & Lane, K. A. | Spanish pediatric picture identification test                                                                                                                                          | AJA          |
| Merritt, B., & Bent, T.                                                               | Perceptual evaluation of speech naturalness in speakers of varying gender identities                                                                                                   | JSLHR        |
| Milford, E. M., Wang, B., Smith, K., Choi, D., Martin-Harris, B., & Garand K. L.      | Aging and sex effects on mastication performance in healthy, nondysphagic, community-dwelling adults                                                                                   | AJSLP        |
| Minga, J., Fromm, D., Williams-DeVane, C., & MacWhinney, B.                           | Question use in adults with right-hemisphere brain damage                                                                                                                              | JSLHR        |
| Murphy, K. A., & Diehm, E. A.                                                         | Collecting words: A clinical example of a morphology-focused orthographic intervention                                                                                                 | LSHSS        |

|                                                                                             |                                                                                                                                           |              |
|---------------------------------------------------------------------------------------------|-------------------------------------------------------------------------------------------------------------------------------------------|--------------|
| Murton, O., Hillman, R., & Mehta, D.                                                        | Cepstral peak prominence values for clinical voice evaluation                                                                             | AJSLP        |
| Myers, B., & Bell, T.                                                                       | Adapting vocal function exercises for voice masculinization                                                                               | Perspectives |
| Nam, S., & Shune, S. E.                                                                     | Behavioral mimicry as a strategy to increase drinking behaviors in older adults                                                           | AJSLP        |
| Natzke, P., Sakash, A., Mahr, T., & Hustad, K. C.                                           | Measuring speech production development in children with cerebral palsy between 6 and 8 years of age: Relationships among measures        | LSHSS        |
| Nelson, L. H., Anderson, K., Whicker, J., Barrett, T., Muñoz, K., & White, K.               | Classroom listening experiences of students who are deaf or hard of hearing using listening inventory for education-revised               | LSHSS        |
| Newbury, J., Justice, L. M., Jiang, H. H., & Schmitt, M. B.                                 | Cognitive, noncognitive, and home environment correlates of reading difficulties in primary-grade students with language impairment       | JSLHR        |
| Nightengale, E. E., Wolter-Warmerdam, K., Yoon, P. J., Daniels, D., & Hickey, F.            | Behavioral audiology procedures in children with Down syndrome                                                                            | AJA          |
| Nightingale, C., Swartz, M., Ramig, L. O., & McAllister, T.                                 | Using crowdsourced listeners' ratings to measure speech changes in hypokinetic dysarthria: A proof-of-concept study                       | AJSLP        |
| Nippold, M. A., LaFavre, S., & Shinham, K.                                                  | How adolescents interpret the moral messages of fables: Examining the development of critical thinking                                    | JSLHR        |
| Nippold, M. A., Nehls-Lowe, A., & Lee, D.                                                   | Development of past tense counterfactual sentences: Examining production and comprehension in adolescents and adults                      | JSLHR        |
| Nitttrouer, S., Lowenstein, J. H., & Antonelli, J.                                          | Parental language input to children with hearing loss: Does it matter in the end?                                                         | JSLHR        |
| Nowell, S.W., Watson, L.R., Crais, E.R., Baranek, G.T., Faldowski, R.A., & Turner-Brown, L. | Joint attention and sensory-regulatory features at 13 and 22 months as predictors of preschool language and social-communication outcomes | JSLHR        |
| O'Fallon, M., Von Holzen, K., & Newman, R. S.                                               | Preschoolers' word-learning during storybook reading interactions: Comparing repeated and elaborated input                                | JSLHR        |



|                                                                                                         |                                                                                                                                                       |       |
|---------------------------------------------------------------------------------------------------------|-------------------------------------------------------------------------------------------------------------------------------------------------------|-------|
| Obermeyer, J., Schlesinger, J., & Martin, N.                                                            | Evaluating the contribution of executive functions to language tasks in cognitively demanding contexts                                                | AJSLP |
| Obermeyer, J. A., Leaman, M. C., & Edmonds, L. A.                                                       | Evaluating change in the conversation of a person with mild aphasia after attentive reading with constrained summarization-written treatment          | AJSLP |
| Orizaba, L., Gorman, B. K., Fiestas, C. E., Bingham, G. E., & Terry, N. P.                              | Examination of narrative language at microstructural and macrostructural levels in Spanish-speaking preschoolers                                      | LSHSS |
| Owens, R. E., & Pavelko, S. L.                                                                          | Sampling Utterances and Grammatical Analysis Revised (SUGAR): Quantitative values for language sample analysis measures in 7- to 11-year-old children | LSHSS |
| Park, Y., Brownell, M. T., Reed, D. K., Tibi, S., & Lombardino, L. J.                                   | Exploring how initial response to instruction predicts morphology outcomes among students with decoding difficulties                                  | LSHSS |
| Park, Y., Cadiz, M. D., Nagle, K. F., & Stepp, C. E.                                                    | Perceptual and acoustic assessment of strain using synthetically modified voice samples                                                               | JSLHR |
| Parker, A., Slack, C., & Skoe, E.                                                                       | Comparisons of auditory brainstem responses between a laboratory and simulated home environment                                                       | JSLHR |
| Patterson, J. L., Rodríguez, B. L., & Dale, P. S.                                                       | Dynamic assessment language tasks and the prediction of performance on year-end language skills in preschool dual language learners                   | AJSLP |
| Pavelko, S. L., Price, L. R., & Owens Jr, R. E.                                                         | Revisiting reliability: Using Sampling Utterances and Grammatical Analysis Revised (SUGAR) to compare 25- and 50-utterance language samples           | LSHSS |
| Perrine, B. L., & Scherer, R. C.                                                                        | Aerodynamic and acoustic voice measures before and after an acute public speaking stressor                                                            | JSLHR |
| Peters-Sanders, L. A., Kelley, E. S., Biel, C. H., Madsen, K., Soto, X., Seven, Y., ... & Goldstein, H. | Moving forward four words at a time: Effects of a supplemental preschool vocabulary intervention                                                      | LSHSS |
| Petersen, D. B., Tonn, P., Spencer, T. D., & Foster, M. E.                                              | The classification accuracy of a dynamic assessment of inferential word learning for bilingual English/Spanish-speaking school-age children           | LSHSS |

|                                                                                                                                   |                                                                                                                                             |              |
|-----------------------------------------------------------------------------------------------------------------------------------|---------------------------------------------------------------------------------------------------------------------------------------------|--------------|
| Petersen, D. B., Spencer, T. D., Konishi, A., Sellars, T. P., Foster, M. E., & Robertson, D.                                      | Using parallel, narrative-based measures to examine the relationship between listening and reading comprehension: A pilot study             | LSHSS        |
| Picou, E. M., Davis, H., Lewis, D., & Tharpe, A. M.                                                                               | Contralateral routing of signal systems can improve speech recognition and comprehension in dynamic classrooms                              | JSLHR        |
| Piker, E. G., Jacobson, G. P., Romero, D., Wang, Y., & Smith, K.                                                                  | The clinical significance of the failure to perceive vertigo in the postcaloric period despite a robust caloric response                    | AJA          |
| Plexico, L. W., Sandage, M. J., Kluess, H. A., Franco-Watkins, A. M., & Neidert, L. E.                                            | Blood plasma hormone-level influence on vocal function                                                                                      | JSLHR        |
| Porter, H.L., Leibold, L.J., & Buss, E.                                                                                           | Effects of self-generated noise on quiet threshold by transducer type in school-age children and adults                                     | JSLHR        |
| Porter, K. L., Oetting, J. B., & Pecchioni, L.                                                                                    | Caregivers' perceptions of speech-language pathologist talk about child language and literacy disorders                                     | AJSLP        |
| Preston, J.L., Hitchcock, E.R., & Leece, M.C.                                                                                     | Auditory perception and ultrasound biofeedback treatment outcomes for children with residual /ɹ/ distortions: A randomized controlled trial | JSLHR        |
| Pua Schleif, E., Pelland, C. M., Ellis, C., Fang, X., Leierer, S. J., Sutton, B. P., Kuehn, D. P., Blemker, S. S., & Perry, J. L. | Identifying predictors of levator veli palatini muscle contraction during speech using dynamic magnetic resonance imaging                   | JSLHR        |
| Quick, N., Roush, J., Erickson, K., & Mundy, M.                                                                                   | A hearing screening pilot study with students with significant cognitive disabilities                                                       | LSHSS        |
| Quinn, E.D., Kaiser, A.P., & Ledford, J.R.                                                                                        | Teaching preschoolers with Down syndrome using augmentative and alternative communication modeling during small group dialogic reading      | AJSLP        |
| Ramsey, A., & Blake, M. L.                                                                                                        | Speech-language pathology practices for adults with right hemisphere stroke: What are we missing?                                           | AJSLP        |
| Reavis, K. M., Henry, J. A., Marshall, L. M., & Carlson, K. F.                                                                    | Prevalence of self-reported depression symptoms and perceived anxiety among community-dwelling U.S. adults reporting tinnitus               | Perspectives |

|                                                                                                                 |                                                                                                                                                       |              |
|-----------------------------------------------------------------------------------------------------------------|-------------------------------------------------------------------------------------------------------------------------------------------------------|--------------|
| Reilly, K. J.                                                                                                   | Vowel and sibilant production in noise: Effects of noise frequency and phonological similarity                                                        | JSLHR        |
| Richardson, L., Roberts, E., & Victor, S.                                                                       | Predicting clinical success in speech-language pathology graduate students                                                                            | Perspectives |
| Richtsmeier, P. T., & Moore, M. W.                                                                              | Perceptual learning and production practice differentially affect how children produce novel words                                                    | JSLHR        |
| Riley, E. A., & Owora, A.                                                                                       | Relationship between physiologically measured attention and behavioral task engagement in persons with chronic aphasia                                | JSLHR        |
| Rincon, C., Johnson, K. N., & Byrd, C.                                                                          | An introductory examination of speech disfluencies in Spanish-English bilingual children who do and do not stutter during narratives                  | Perspectives |
| Rishiq, D., Harkrider, A., Springer, C., & Hedrick, M.                                                          | Effects of aging on the subcortical encoding of stop consonants                                                                                       | AJA          |
| Roberts, J. A., Altenberg, E. P., & Hunter, M.                                                                  | Machine-scored syntax: Comparison of the CLAN automatic scoring program to manual scoring                                                             | LSHSS        |
| Roberts, R. A., Jacobson, G. P., & Hatton, K.                                                                   | Multiple co-occurring vestibular disorders identified using the dizziness symptom profile                                                             | AJA          |
| Roche, J. M., Arnold, H. S., & Ferguson, A. M.                                                                  | Social judgments of digitally manipulated stuttered speech: Cognitive heuristics drive implicit and explicit bias                                     | JSLHR        |
| Rodgers, N. H., Lau, J. Y. Y., & Zebrowski, P. M.                                                               | Attentional bias among adolescents who stutter: Evidence for a vigilance-avoidance effect                                                             | LSHSS        |
| Roepke, E., Bower, K. E., Miller, C. A., & Brosseau-Lapre, F.                                                   | The speech "bamana": Using the syllable repetition task to identify underlying phonological deficits in children with speech and language impairments | JSLHR        |
| Rogus-Pulia, N. M., Jones, C. A., Forgues, A. L., Orne, J., Macdonald, C. L., Connor, N. P., & McCulloch, T. M. | Perceived professional and institutional factors influencing clinical adoption of pharyngeal high-resolution manometry                                | AJSLP        |
| Roitsch, J., Murphy, K.A., & Raymer, A.M.                                                                       | Executive functions and clinical and academic outcomes in speech-language pathology graduate students                                                 | Perspectives |

|                                                                              |                                                                                                                                                                                 |              |
|------------------------------------------------------------------------------|---------------------------------------------------------------------------------------------------------------------------------------------------------------------------------|--------------|
| Rojas, R., & Irani, F.                                                       | Classifying disfluencies in preschool- and school-age Spanish-English bilinguals who do not stutter: An exploratory study                                                       | Perspectives |
| Roman, A. M., Liebenberg, H. E., & Harkins, A. N.                            | The impact of audibility and voice on young adult performance on the Mini-Mental State Examination                                                                              | Perspectives |
| Romano, M., Kaiser, A., Lounds-Taylor, J., & Woods, J.                       | Rates of prelinguistic communication and early symbol use in young children with Down syndrome: Using a progress-monitoring tool to model growth                                | AJSLP        |
| Rong, P.                                                                     | Neuromotor control of speech and speechlike tasks: Implications from articulatory gestures                                                                                      | Perspectives |
| Rong, P.                                                                     | Automated acoustic analysis of oral diadochokinesis to assess bulbar motor involvement in amyotrophic lateral sclerosis                                                         | JSLHR        |
| Roup, C. M., Green, D. E., & DeBacker, J. R.                                 | The impact of speech recognition testing on state anxiety in young, middle-age, and older adults                                                                                | JSLHR        |
| Rule, D. W., Kelchner, L., Mulkern, A., Couch, S., Silbert, N., & Welden, K. | Implementation strategies for the International Dysphagia Diet Standardisation Initiative (IDDSI), part I: Quantitative analysis of IDDSI performance among varied participants | AJSLP        |
| Ryer, J. E., & Poll, G. H.                                                   | The effectiveness of hybrid telepractice and in-person fluency treatment for a school-aged child: A case study                                                                  | Perspectives |
| Sabry, A., Mahoney, A. S., Mao, S., Khalifa, Y., Sejdić, E., & Coyle, J. L.  | Automatic estimation of laryngeal vestibule closure duration using high-resolution cervical auscultation signals                                                                | Perspectives |
| Sachs, A., Rising, K., & Beeson, P. M.                                       | A retrospective study of long-term improvement on the Boston Naming Test                                                                                                        | AJSLP        |
| Sakash, A., Mahr, T. J., Natzke, P. E. M., & Hustad, K. C.                   | Effects of rate manipulation on intelligibility in children with cerebral palsy                                                                                                 | AJSLP        |
| Salanger, M., Lewis, D., Vallier, T., McDermott, T., & Dergan, A.            | Applying virtual reality to audiovisual speech perception tasks in children                                                                                                     | AJA          |
| Salehomoum, M.                                                               | Inclusion of signing deaf or hard-of-hearing students: Factors that facilitate versus challenge access and participation                                                        | Perspectives |

|                                                                                                           |                                                                                                                                                            |              |
|-----------------------------------------------------------------------------------------------------------|------------------------------------------------------------------------------------------------------------------------------------------------------------|--------------|
| Salvo, H. D. & Schmidt, A. M.                                                                             | Acoustic measures of emotion in school-age children who stutter: Findings from a single subject                                                            | Perspectives |
| Sandage, M. J., Dunn, L. A., Edwards, R., & Pope, S. A.                                                   | Implications of compression race suit on forced vital capacity: Assessment considerations for paradoxical vocal fold motion in competitive female swimmers | AJSLP        |
| Sandberg, C.W., & Gray, T.                                                                                | Abstract semantic associative network training: A replication and update of an abstract word retrieval therapy program                                     | AJSLP        |
| Saunders, G. H., Bott, A., & Tietz, L. H. B.                                                              | Hearing care providers' perspectives on the utility of datalogging information                                                                             | AJA          |
| Schmitt, J., & Gillispie, M.                                                                              | The untapped potential of preschool classroom volunteers in language-literacy instruction: A feasibility study                                             | Perspectives |
| Schmitt, M. B.                                                                                            | Children's active engagement in public school language therapy relates to greater gains                                                                    | AJSLP        |
| Schow, R. L., Whitaker, M. M., Seikel, J. A., Brockett, J. E., & Domitz Vieira, D. M.                     |                                                                                                                                                            | LSHSS        |
| Seven, Y., Ferron, J., & Goldstein, H.                                                                    | Effects of embedding decontextualized language through book-sharing delivered by mothers and fathers in coparenting environments                           | JSLHR        |
| Seven, Y., Hull, K., Madsen, K., Ferron, J., Peters-Sanders, L., Soto, X., Kelley, E. S., & Goldstein, H. | Classwide extensions of vocabulary intervention improve learning of academic vocabulary by preschoolers                                                    | JSLHR        |
| Shafiro, V., Hebb, M., Walker, C., Oh, J., Hsiao, Y., Brown, K., ... & Moberly, A. C.                     | Development of the basic auditory skills evaluation battery for online testing of cochlear implant listeners                                               | AJA          |
| Shaikh, M. A., Baker, B., & Levy, A.                                                                      | Comparison of questionnaire-based and performance-based screening tools as predictors of auditory processing disorder                                      | AJA          |
| Shao, D., Moberly, A. C., & Ray, C.                                                                       | Quality of life outcomes reported by patients and significant others following cochlear implantation                                                       | AJA          |
| Short, E. J., Schindler, R. C., Obeid, R., Noeder, M.                                                     | Examining the role of language in play among children with and without developmental disabilities                                                          | LSHSS        |

|                                                                                                 |                                                                                                                                                                                    |              |
|-------------------------------------------------------------------------------------------------|------------------------------------------------------------------------------------------------------------------------------------------------------------------------------------|--------------|
| M., Hlavaty, L. E., Gross, S. I., ... & Manos, M. M.                                            |                                                                                                                                                                                    |              |
| Siller, M., Morgan, L., & Fuhrmeister, S.                                                       | Social communication predictors of successful inclusion experiences for students with autism in an early childhood lab school                                                      | Perspectives |
| Simon-Cereijido, G., Bedore, L. M., Peña, E. D., & Iglesias, A.                                 | Insights into category sorting flexibility in bilingual children: Results of a cognitive lab study                                                                                 | AJSLP        |
| Singer, C. M., Walden, T. A., & Jones, R. M.                                                    | Attention, speech-language dissociations, and stuttering chronicity                                                                                                                | AJSLP        |
| Singh, J., & Doherty, K. A.                                                                     | Use of a mild-gain hearing aid by middle-age normal-hearing adults who do and do not self-report trouble hearing in background noise                                               | AJA          |
| Skibbe, L. E., Bowles, R. P., Goodwin, S., Troia, G. A., & Konishi, H.                          | The Access to Literacy Assessment System for Phonological Awareness: An adaptive measure of phonological awareness appropriate for children with speech and/or language impairment | LSHSS        |
| Smith, D. J., Stepp, C., Guenther, F. H., & Kearney, E.                                         | Contributions of auditory and somatosensory feedback to vocal motor control                                                                                                        | JSLHR        |
| Smith, K. G., & Ryan, A. E.                                                                     | Relationship between single word reading, connected text reading, and reading comprehension in persons with aphasia                                                                | AJSLP        |
| Smolak, E., McGregor, K. K., Arbisi-Kelm, T., & Eden, N.                                        | Sustained attention in developmental language disorder and its relation to working memory and language                                                                             | JSLHR        |
| Smolen, E. R., Hartman, M. C., & Wang, Y.                                                       | Reading achievement in children with hearing loss who use listening and spoken language: Results and implications from a 2-year study                                              | Perspectives |
| Snell, E. N., Plexico, L. W., Weaver, A. J., & Sandage, M. J.                                   | Quantifying vocal power: Correlation of whole-body anaerobic power to vocal function measures                                                                                      | JSLHR        |
| Snyder, G., Williams, M. G., Adams, C., & Blanchet, P.                                          | The effects of different sources of stuttering disclosure on the perceptions of a child who stutters                                                                               | LSHSS        |
| Soto, X., Seven, Y., McKenna, M., Madsen, K., Peters-Sanders, L., Kelley, E.S., & Goldstein, H. | Iterative development of a home review program to promote preschoolers' vocabulary skills: Social validity and learning outcomes                                                   | LSHSS        |

|                                                                                                    |                                                                                                                                                                                 |              |
|----------------------------------------------------------------------------------------------------|---------------------------------------------------------------------------------------------------------------------------------------------------------------------------------|--------------|
| Soto, X.T., Crucet-Choi, A., & Goldstein, H.                                                       | Effects of a supplemental Spanish phonological awareness intervention on Latinx preschoolers' dual language emergent literacy skills                                            | AJSLP        |
| Souza, P., Gallun, F., & Wright, R.                                                                | Contributions to speech-cue weighting in older adults with impaired hearing                                                                                                     | JSLHR        |
| Sparapani, N., Solari, E., Towers, L., McIntyre, N., Henry, A., & Zajic, M.                        | Secondary analysis of reading-based activities utilizing a scripted language approach: Evaluating interactions between students with autism and their interventionists          | JSLHR        |
| Spencer, K. A., Paul, J., Brown, K. A., Ellerbrock, T., & Sohlberg, M. M.                          | Cognitive rehabilitation for individuals with Parkinson's disease: Developing and piloting an external aids treatment program                                                   | AJSLP        |
| Srinivasan, N. K., Holtz, A., & Gallun, F. J.                                                      | Comparing spatial release from masking using traditional methods and portable automated rapid testing iPad app                                                                  | AJA          |
| Stager, S. V., Sparks, A. D., Bielamowicz, S. A., & Edgar, J. D.                                   | The role of choral singing in speaking voice preservation of aging adults                                                                                                       | JSLHR        |
| Sylvan, L., Brock, K. L., Perkins, A., & Garrett, J.                                               | Building blocks of knowledge: A close look at prerequisite coursework for graduate programs in speech-language pathology                                                        | Perspectives |
| Sylvan, L., Goldstein, E., & Crandall, M.                                                          | Capturing a moment in time: A survey of school-based speech-language pathologists' experiences in the immediate aftermath of the COVID-19 public health emergency               | Perspectives |
| Tai, Y., & Husain, F. T.                                                                           | Association between tinnitus pitch and consonant recognition in noise                                                                                                           | AJA          |
| Talkington, W. J., Donai, J., Kadner, A. S., Layne, M. L., Forino, A., Wen, S., ... & Lewis, J. W. | Electrophysiological evidence of early cortical sensitivity to human conspecific mimic voice as a distinct category of natural sound                                            | JSLHR        |
| Tambyraja, S. R.                                                                                   | Facilitating parental involvement in speech therapy for children with speech sound disorders: A survey of speech-language pathologists' practices, perspectives, and strategies | AJSLP        |
| Tambyraja, S. R., Farquharson, K., & Justice, L.                                                   | Reading risk in children with speech sound disorder: Prevalence, persistence, and predictors                                                                                    | JSLHR        |
| Taylor, S., Dromey, C., Nissen, S. L., Tanner, K.,                                                 | Age-related changes in speech and voice: Spectral and cepstral measures                                                                                                         | JSLHR        |



|                                                                                                                     |                                                                                                                                                      |              |
|---------------------------------------------------------------------------------------------------------------------|------------------------------------------------------------------------------------------------------------------------------------------------------|--------------|
| Eggett, D., & Corbin-Lewis, K.                                                                                      |                                                                                                                                                      |              |
| Telesca, L., Ehren, B. J., Hahs-Vaughn, D. L., Zygouris-Coe, V. I., & Kong, A. P.-H.                                | The effect of metalinguistic sentence combining on eighth-grade students' understanding and written expression of comparison and contrast in science | JSLHR        |
| Themistocleous, C., Neophytou, K., Rapp, B., & Tsapkini, K.                                                         | A tool for automatic scoring of spelling performance                                                                                                 | JSLHR        |
| Theodore, R. M., Monto, N. R., & Graham, S.                                                                         | Individual differences in distributional learning for speech: What's ideal for ideal observers?                                                      | JSLHR        |
| Thome, E. K., Loveall, S. J., & Henderson, D. E.                                                                    | A survey of speech-language pathologists' understanding and reported use of evidence-based practice                                                  | Perspectives |
| Thompson, E. C., Benítez-Barrera, C. R., Angley, G. P., Woynaroski, T., & Tharpe, A. M.                             | Remote microphone system use in the homes of children with hearing loss: Impact on caregiver communication and child vocalizations                   | JSLHR        |
| Tichenor, S., & Yaruss, J.S.                                                                                        | Repetitive negative thinking, temperament, and adverse impact in adults who stutter                                                                  | AJSLP        |
| Torre III, P., & Reed, M. B.                                                                                        | Self-reported drug use and hearing measures in young adults                                                                                          | JSLHR        |
| Torre, P., Russell, J. S., Smith, R., Hoffman, H. J., Lee, S., Williams, P. L., & Yao, T.-J.                        | Words-in-noise test performance in young adults perinatally HIV infected and exposed, uninfected                                                     | AJA          |
| Tracy, L. F., Segina, R. K., Cadiz, M. D., & Stepp, C. E.                                                           | The impact of communication modality on voice production                                                                                             | JSLHR        |
| Tucker, D.A., Compton, M.V., Allen, S.J., Mayo, R., Hooper, C., Ogletree, B., Flynn, P., Frazier, A., & McMurry, S. | Exploring barriers to doctoral education in communication sciences and disorders: Insights from practicing professionals                             | Perspectives |
| Tumanova, V., Woods, C., & Razza, R.                                                                                | The role of behavioral inhibition for conversational speech and language characteristics of preschool-age children who stutter                       | AJSLP        |
| Tumanova, V., Woods, C., & Wang, Q.                                                                                 | Effects of physiological arousal on speech motor control and speech motor practice in preschool-age children who do and do not stutter               | JSLHR        |

|                                                                                                                                                                                              |                                                                                                                                                                                                        |       |
|----------------------------------------------------------------------------------------------------------------------------------------------------------------------------------------------|--------------------------------------------------------------------------------------------------------------------------------------------------------------------------------------------------------|-------|
| Utianski, R. L., Clark, H. M., Duffy, J. R., Botha, H., Whitwell, J. L., Josephs, K. A.                                                                                                      | Communication limitations in patients with progressive apraxia of speech and aphasia                                                                                                                   | AJSLP |
| Van Stan, J. H., Mehta, D. D., Ortiz, A. J., Burns, J. A., Marks, K. L., Toles, L. E., Stadelman-Cohen, T., Krusemark, C., Muise, J., Hron, T., Zeitels, S. M., Fox, A. B., & Hillman, R. E. | Changes in a daily phonotrauma index after laryngeal surgery and voice therapy: Implications for the role of daily voice use in the etiology and pathophysiology of phonotraumatic vocal hyperfunction | JSLHR |
| Van Stan, J. H., Mehta, D. D., Ortiz, A. J., Burns, J. A., Toles, L. E., Marks, K. L., Vangel, M., Hron, T., Zeitels, S., & Hillman, R. E.                                                   | Differences in weeklong ambulatory vocal behavior between female patients with phonotraumatic lesions and matched controls                                                                             | JSLHR |
| Venezia, J. H., Leek, M. R., & Lindeman, M. P.                                                                                                                                               | Suprathreshold differences in competing speech perception in older listeners with normal and impaired hearing                                                                                          | JSLHR |
| Venkatraman, A., Fujiki, R. B., Craig, B. A., Sivasankar, M. P., Malandraki, G. A.                                                                                                           | Determining the underlying relationship between swallowing and maximum vocal pitch elevation: A preliminary study of their hyoid biomechanics in healthy adults                                        | JSLHR |
| Venker, C. E., McDaniel, J., & Yasick, M.                                                                                                                                                    | Speech-language pathologists' ratings of telegraphic versus grammatical utterances: A survey study                                                                                                     | JSLHR |
| Vidal, V., McAllister, A., & DeThorne, L.                                                                                                                                                    | Communication profile of a minimally verbal school-age autistic child: A case study                                                                                                                    | LSHSS |
| Vuolo, J., & Goffman, L.                                                                                                                                                                     | Vowel accuracy and segmental variability differentiate children with developmental language disorder in nonword repetition                                                                             | JSLHR |
| Wada, R., Gillam, S. L., & Gillam, R. B.                                                                                                                                                     | The use of structural priming and focused recasts to facilitate the production of subject- and object-focused relative clauses by school-age children with and without developmental language disorder | AJSLP |
| Walker, E. A., Sapp, C., Dallapiazza, M., Spratford, M., McCreery, R. W., & Oleson, J. J.                                                                                                    | Language and reading outcomes in fourth-grade children with mild hearing loss compared to age-matched hearing peers                                                                                    | LSHSS |

|                                                                                                                                                              |                                                                                                                                                                                                            |              |
|--------------------------------------------------------------------------------------------------------------------------------------------------------------|------------------------------------------------------------------------------------------------------------------------------------------------------------------------------------------------------------|--------------|
| Wallace, S. E., Donoso Brown, E. V., Saylor, A., Lapp, E., & Eskander, J.                                                                                    | Designing occupational therapy home programs for people with aphasia: Aphasia-friendly modifications                                                                                                       | Perspectives |
| Walsh, B., Bostian, A., Tichenor, S. E., Brown, B., & Weber, C.                                                                                              | Disfluency characteristics of 4- and 5-year-old children who stutter and their relationship to stuttering persistence and recovery                                                                         | JSLHR        |
| Walters, C. E., Nitin, R., Margulis, K., Boorum, O., Gustavson, D. E., Bush, C. T., Davis, L. K., Below, J. E., Cox, N. J., Camarata, S. M., & Gordon, R. L. | Automated Phenotyping Tool for identifying Developmental Language Disorder cases in health systems data (APT-DLD): A new research algorithm for deployment in large-scale electronic health record systems | JSLHR        |
| Wambaugh, J. L., Wright, S., Nessler, C., Mauszycki, S. C., Bunker, L., Boss, E., Zhang, Y., Hula, W. D., & Doyle, P. J.                                     | Further study of the effects of treatment intensity on outcomes of sound production treatment for acquired apraxia of speech: Does dose frequency matter?                                                  | AJSLP        |
| Wang, Y., Jung, J., Bergeson, T. R., & Houston, D. M.                                                                                                        | Lexical repetition properties of caregiver speech and language development in children with cochlear implants                                                                                              | JSLHR        |
| Ward, M., Skelley-Ashford, M., Brown, K., Ashford, J., & Suiter, D.                                                                                          | Validation of the Yale Swallow Protocol in post-acute care: A prospective, double-blind, multirater study                                                                                                  | AJSLP        |
| Watson, M., O'Keefe, C., Wallace, A., & Terrell, P.                                                                                                          | A survey of reading teachers: Collaboration with speech-language pathologists                                                                                                                              | Perspectives |
| Weerathunge, H. R., Abur, D., Enos, N. M., Brown, K. M., & Stepp, C. E.                                                                                      | Auditory-motor perturbations of voice fundamental frequency: Feedback delay and amplification                                                                                                              | JSLHR        |
| Werfel, K. L., & Lawrence, S.                                                                                                                                | Improving conceptual print knowledge: A description of intervention considerations for children with hearing loss                                                                                          | Perspectives |
| Werfel, K. L., Peek, L., Reynolds, G., & Bassard, S.                                                                                                         | Hearing screening failure among students with reading impairment: Rate and relation to specific reading deficits                                                                                           | Perspectives |
| West, K. L., Roemer, E. J., Northrup, J. B., & Iverson, J. M.                                                                                                | Profiles of early actions and gestures in infants with an older sibling with autism spectrum disorder                                                                                                      | JSLHR        |
| Wheeler, L. R., & Tharpe, A. M.                                                                                                                              | Young children's attitudes toward peers who wear hearing aids                                                                                                                                              | AJA          |

|                                                                                         |                                                                                                                                                                   |              |
|-----------------------------------------------------------------------------------------|-------------------------------------------------------------------------------------------------------------------------------------------------------------------|--------------|
| Whicker, J. J., Smith, B. K., & Muñoz, K.                                               | Parent and professional perceptions and feedback on the content of an eHealth hearing aid learning series for parents of children who are deaf or hard-of-hearing | Perspectives |
| Whicker, J. J., Ong, C. W., Muñoz, K., & Twohig, M. P.                                  | The relationship between psychological processes and indices of well-being among adults with hearing loss                                                         | AJA          |
| Wilson, J. J., Simmons, A. K., & H. McCarthy, J.                                        | Pediatric dysphagia: Survey results describing speech-language pathologists' education and experience                                                             | Perspectives |
| Wilson, U. S., Browning-Kamins, J., Boothalingam, S., Moleti, A., Sisto, R., & Dhar, S. | Relationship between behavioral and stimulus frequency otoacoustic emissions delay-based tuning estimates                                                         | JSLHR        |
| Winters, K. L. & Byrd, C. T.                                                            | Pediatrician referral practices for children who stutter                                                                                                          | AJSLP        |
| Wolter, J. A., Gibson, F. E., & Slocum, T. A.                                           | A dynamic measure of morphological awareness and first-grade literacy skill                                                                                       | LSHSS        |
| Wood, C. L., Schatschneider, C., & VelDink, A.                                          | The relation between academic word use and reading comprehension for students from diverse backgrounds                                                            | LSHSS        |
| Wray, A. H., & Spray, G.                                                                | Neural processes underlying nonword rhyme differentiate eventual stuttering persistence and recovery                                                              | JSLHR        |
| Wynn, C. J., & Borrie, S. A.                                                            | Methodology matters: The impact of research design on conversational entrainment outcomes                                                                         | JSLHR        |
| Xu, J., Wu, Y. H., Stangl, E., Crukley, J., Pentony, S., & Galster, J.                  | Using smartphone-based ecological momentary assessment in audiology research: The participants' perspective                                                       | AJA          |
| Yuana, H. & Dollaghan, C.                                                               | Applying item response theory modeling to identify social (pragmatic) communication disorder                                                                      | JSLHR        |

*Note.* Final included corpus comprised of  $k = 407$  articles, published and paginated in 2020. AJA = *American Journal of Audiology*. AJSLP = *American Journal of Speech-Language Pathology*. JSLHR = *Journal of Speech, Language, and Hearing Research*. LSHSS = *Language, Speech, and Hearing Services in Schools*. Perspectives = *Perspectives of the ASHA Special Interest Groups*.
